# Supplementary material for: Background frequencies for residue variability estimates: BLOSUM revisited
Source: PubMed Central journal article supplement (PMC2267808; doi:10.1186/1471-2105-8-488), 2007-12-27
Supplement: 1471-2105-8-488-S1.pdf [file 1471-2105-8-488-S1.pdf]

# Background frequencies for residue variability estimates: BLOSUM revisited – Supplementary Material

I. Mihalek, I. Reš, and O. Lichtarge  
Department of Molecular and Human Genetics,  
Baylor College of Medicine, One Baylor Plaza, Houston, TX 77030

November 9, 2007

| A      | R      | N      | D      | C      | Q      | E      | G      | H      | I      | L      | K      | M      | F      | P      | S      | T      | W      | Y      | V      |
|--------|--------|--------|--------|--------|--------|--------|--------|--------|--------|--------|--------|--------|--------|--------|--------|--------|--------|--------|--------|
| 0.1681 |        |        |        |        |        |        |        |        |        |        |        |        |        |        |        |        |        |        |        |
| 0.0451 | 0.1917 |        |        |        |        |        |        |        |        |        |        |        |        |        |        |        |        |        |        |
| 0.0402 | 0.0376 | 0.1401 |        |        |        |        |        |        |        |        |        |        |        |        |        |        |        |        |        |
| 0.0467 | 0.0455 | 0.0704 | 0.2289 |        |        |        |        |        |        |        |        |        |        |        |        |        |        |        |        |
| 0.0222 | 0.0208 | 0.0282 | 0.0178 | 0.3769 |        |        |        |        |        |        |        |        |        |        |        |        |        |        |        |
| 0.0340 | 0.0530 | 0.0469 | 0.0326 | 0.0195 | 0.1177 |        |        |        |        |        |        |        |        |        |        |        |        |        |        |
| 0.0527 | 0.0521 | 0.0516 | 0.0813 | 0.0529 | 0.0940 | 0.1696 |        |        |        |        |        |        |        |        |        |        |        |        |        |
| 0.0848 | 0.0536 | 0.0931 | 0.0576 | 0.0444 | 0.0600 | 0.0476 | 0.2842 |        |        |        |        |        |        |        |        |        |        |        |        |
| 0.0201 | 0.0253 | 0.0392 | 0.0254 | 0.0333 | 0.0257 | 0.0232 | 0.0201 | 0.2344 |        |        |        |        |        |        |        |        |        |        |        |
| 0.0466 | 0.0357 | 0.0493 | 0.0324 | 0.0293 | 0.0369 | 0.0303 | 0.0263 | 0.0352 | 0.1416 |        |        |        |        |        |        |        |        |        |        |
| 0.0626 | 0.0632 | 0.0565 | 0.0593 | 0.0594 | 0.0622 | 0.0069 | 0.0011 | 0.0640 | 0.1208 | 0.2021 |        |        |        |        |        |        |        |        |        |
| 0.0585 | 0.0857 | 0.0636 | 0.0564 | 0.0458 | 0.0650 | 0.0738 | 0.0351 | 0.0441 | 0.0441 | 0.0195 | 0.1443 |        |        |        |        |        |        |        |        |
| 0.0221 | 0.0241 | 0.0275 | 0.0130 | 0.0180 | 0.0310 | 0.0151 | 0.0178 | 0.0731 | 0.0273 | 0.0345 | 0.0234 | 0.0612 |        |        |        |        |        |        |        |
| 0.0317 | 0.0375 | 0.0368 | 0.0253 | 0.0261 | 0.0325 | 0.0260 | 0.0250 | 0.0454 | 0.0500 | 0.0586 | 0.0361 | 0.0596 | 0.1903 |        |        |        |        |        |        |
| 0.0359 | 0.0374 | 0.0350 | 0.0398 | 0.0250 | 0.0467 | 0.0461 | 0.0372 | 0.0552 | 0.0388 | 0.0288 | 0.0464 | 0.0289 | 0.0251 | 0.2932 |        |        |        |        |        |
| 0.0719 | 0.0547 | 0.0587 | 0.0527 | 0.0377 | 0.0671 | 0.0542 | 0.0385 | 0.0554 | 0.0462 | 0.0037 | 0.0573 | 0.0490 | 0.0481 | 0.0450 | 0.1323 |        |        |        |        |
| 0.0514 | 0.0375 | 0.0489 | 0.0401 | 0.0453 | 0.0458 | 0.0450 | 0.0348 | 0.0458 | 0.0452 | 0.0457 | 0.0495 | 0.0503 | 0.0417 | 0.0509 | 0.0677 | 0.1167 |        |        |        |
| 0.0106 | 0.0135 | 0.0079 | 0.0079 | 0.0299 | 0.0394 | 0.0109 | 0.0101 | 0.0426 | 0.0089 | 0.0121 | 0.0123 | 0.3051 | 0.0463 | 0.0184 | 0.0097 | 0.0348 | 0.1789 |        |        |
| 0.0313 | 0.0336 | 0.0274 | 0.0240 | 0.0267 | 0.0514 | 0.0274 | 0.0273 | 0.0592 | 0.0378 | 0.0379 | 0.0300 | 0.0477 | 0.0901 | 0.0255 | 0.0312 | 0.0281 | 0.1588 | 0.1440 |        |
| 0.0633 | 0.0524 | 0.0411 | 0.0430 | 0.0409 | 0.0388 | 0.0396 | 0.0015 | 0.0333 | 0.1173 | 0.0012 | 0.0095 | 0.0714 | 0.0678 | 0.0407 | 0.0189 | 0.0746 | 0.0420 | 0.0608 | 0.1419 |

Table 1: Reference distribution  $Q(x_1, x_2)$ .

| <b>PDB chain</b> | <b>structural content according to SCOP</b> |
|------------------|---------------------------------------------|
| 1agrE            | All alpha                                   |
| 1agrA            | All alpha                                   |
| 1a2kD            | Alpha and beta (a/b)                        |
| 1a2kA            | Alpha and beta (a+b)                        |
| 1a0oF            | Alpha and beta (a+b)                        |
| 1a0oE            | Alpha and beta (a/b)                        |
| 1cxzB            | All alpha                                   |
| 1cxzA            | Alpha and beta (a/b)                        |
| 1ceeB            | Small proteins                              |
| 1ceeA            | Alpha and beta (a/b)                        |
| 1c1yB            | Alpha and beta (a+b)                        |
| 1c1yA            | Alpha and beta (a/b)                        |
| 1e96B            | All alpha                                   |
| 1e96A            | Alpha and beta (a/b)                        |
| 1foeB            | Alpha and beta (a/b)                        |
| 1foeA            | All alpha                                   |
| 1finB            | All alpha                                   |
| 1finA            | Alpha and beta (a+b)                        |
| 1gotB            | All beta                                    |
| 1gotA            | All alpha                                   |
| 1he1C            | Alpha and beta (a/b)                        |
| 1he1A            | All alpha                                   |
| 1ibrB            | All alpha                                   |
| 1ibrA            | Alpha and beta (a/b)                        |
| 1lfdB            | Alpha and beta (a/b)                        |
| 1lfdA            | Alpha and beta (a/b)                        |
| 1rrpB            | All beta                                    |
| 1rrpA            | Alpha and beta (a/b)                        |
| 1wq1R            | Alpha and beta (a/b)                        |
| 1wq1G            | All alpha                                   |
| 1ycsB            | All beta                                    |
| 1ycsA            | All beta                                    |
| 1zbdB            | Small proteins                              |
| 1zbdA            | Alpha and beta (a/b)                        |
| 2trcP            | Alpha and beta (a/b)                        |
| 2trcB            | All beta                                    |

Table 2: SCOP classification of the transient dimers used as the test set in the main text.

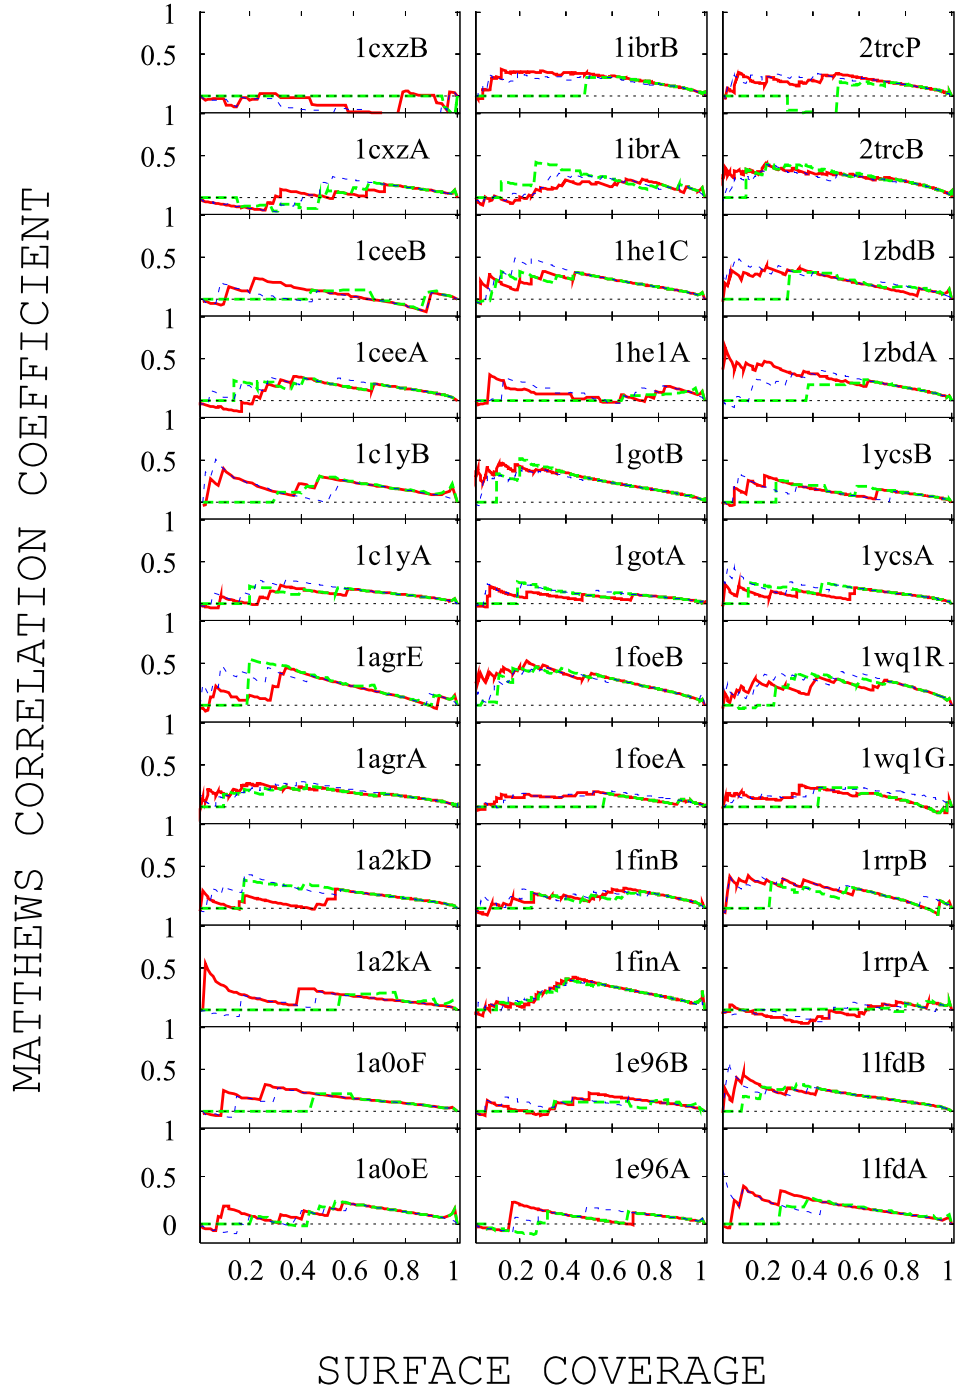

Figure 1: Matthews coefficient as a function of surface coverage, using the same sequence sets as in Fig. 3 in the main text. Red:  $H_{BB}$ ; green: column entropy; blue: rate4site.

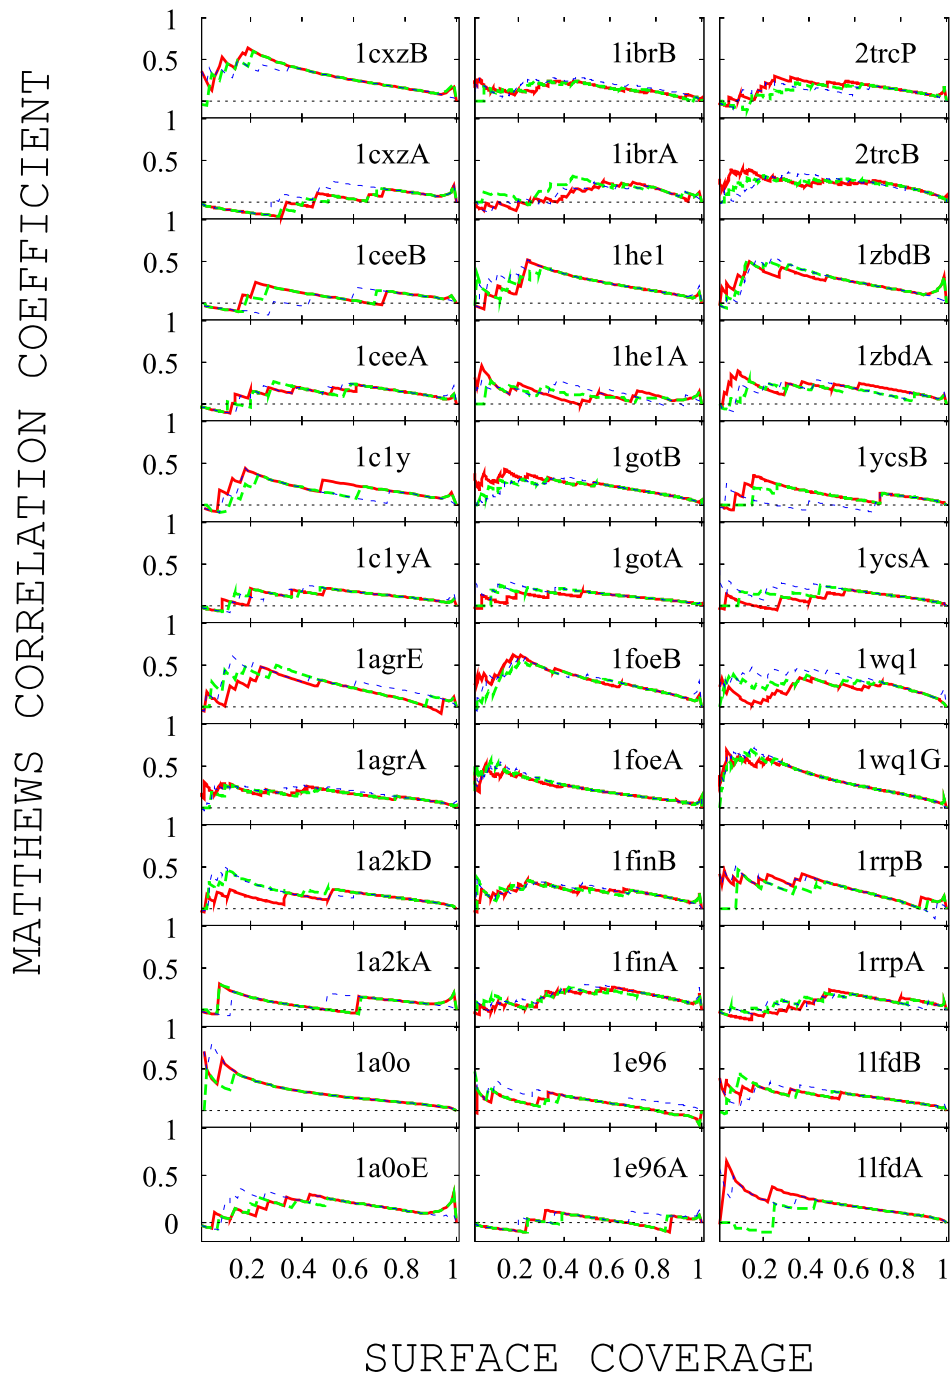

Figure 2: Matthews coefficient as a function of surface coverage, using the same sequence sets as in Fig. 4 in the main text. Red:  $H_{BB}$ ; green: column entropy; blue: rate4site.

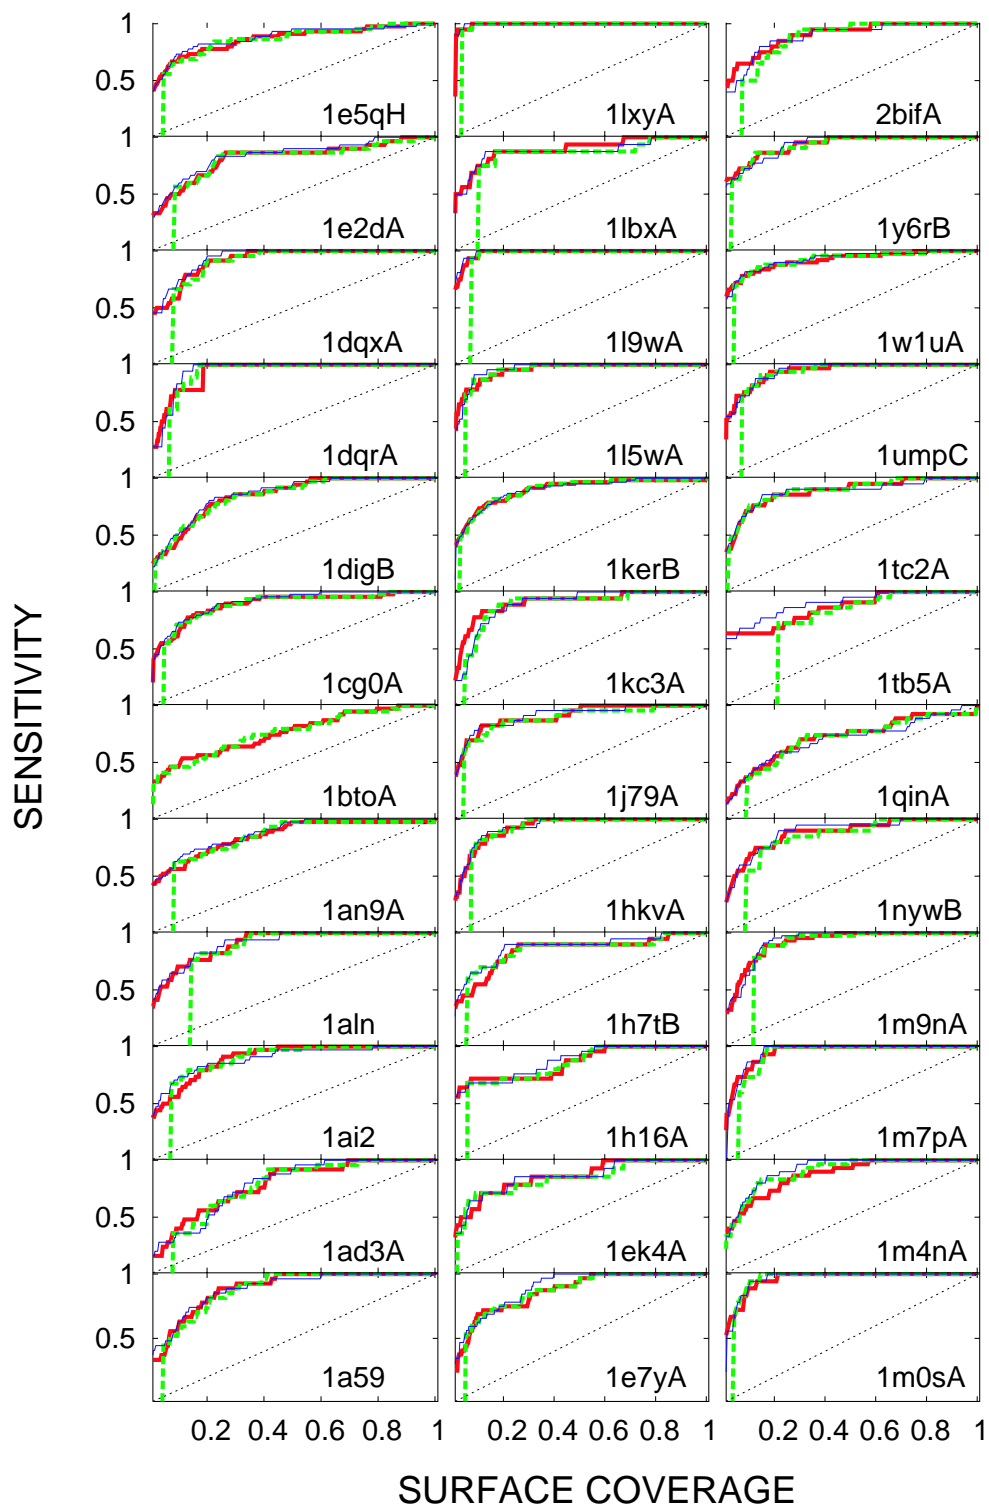

Figure 3: The ability of three different methods to detect catalytic sites of enzymes. The functional site is defined here as the set of residues within  $5\text{\AA}$  of the substrate or the cofactor. Horizontal axis: fraction of surface appearing among the top scoring residues (surface coverage). Vertical axis: fraction of catalytic site detected. Thick full line: Kullback-Leibler joint entropy; thick dashed line: column entropy; thin line: rate4site. (The alignment used for 1btoA was too large for rate4site). Protein Databank Identifier of each protein is indicated in the corner of each panel. The sequences are selected as in Fig. 4 in the text.

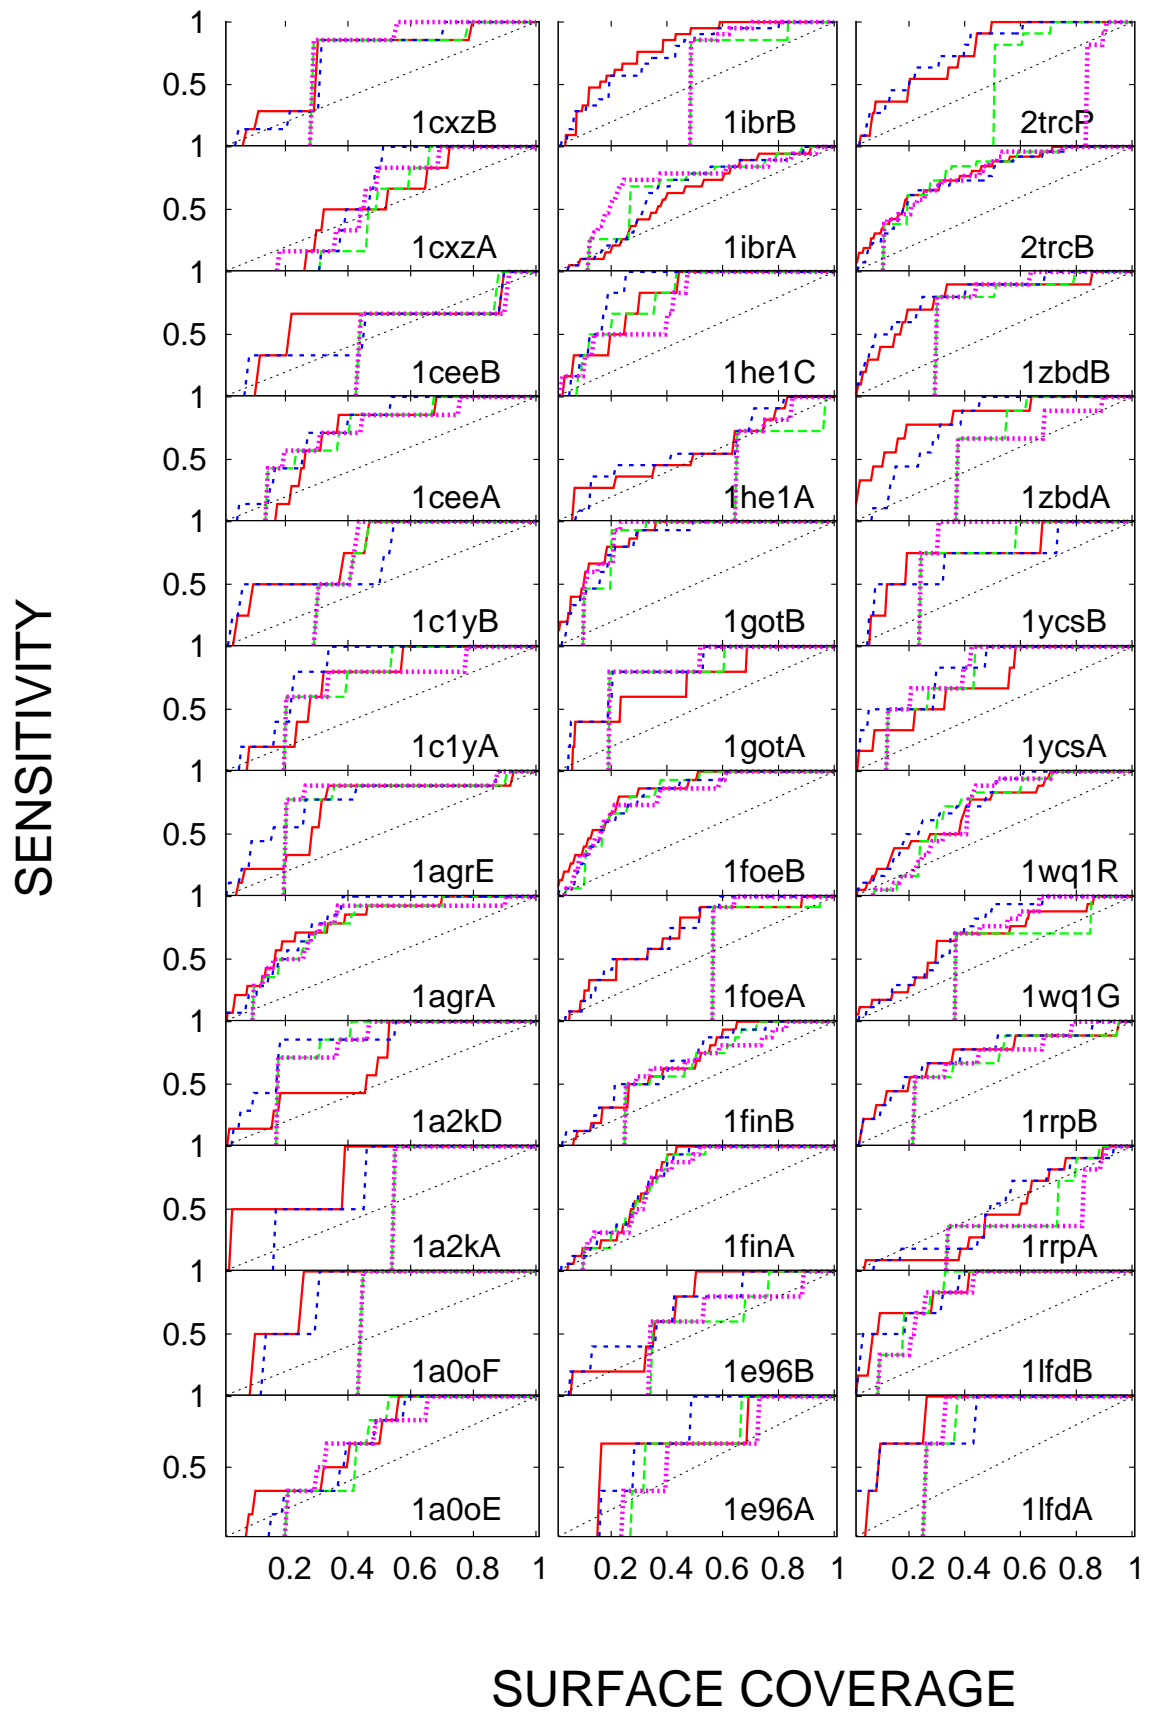

Figure 4:

Figure 4 (Previous page): Comparison of the method of Valdar and Thornton<sup>1,2</sup> with the methods used in the main text. The test set is the same as in Fig. 3 in the main text. Full red line: joint entropy, evaluated according to Eq.6 in the text; dashed green line: Shannon entropy; dashed blue line: rate4site. Pink: Valdar. The results obtained using the method described in the text ( $H_{BB}$ ) differ from Valdar's with  $p$ -value of  $1 \times 10^{-4}$  on the Wilcoxon test. Valdar's method was designed to deal with unequal sampling from the sequence space, not a very strong issue in a set of close homologues used here. By setting the diagonal elements in the scoring matrix to the same average value (<sup>1</sup>), the method starts suffering from the same problem as the entropy - namely the inability to distinguish among different conserved amino acid types.



## References

- [1] Valdar W, Thornton J: **Protein–protein interfaces: Analysis of amino acid conservation in homodimers.** *Proteins Structure Function and Genetics* 2001, **42**:108–124.
- [2] Valdar W: **Scoring Residue Conservation.** *Proteins Struct. Funct. Genet.* 2002, **48**:227–241. [[Http://www.ebi.ac.uk/thornton-srv/databases/cgi-bin/valdar/scorecons\\_server.pl](http://www.ebi.ac.uk/thornton-srv/databases/cgi-bin/valdar/scorecons_server.pl)].

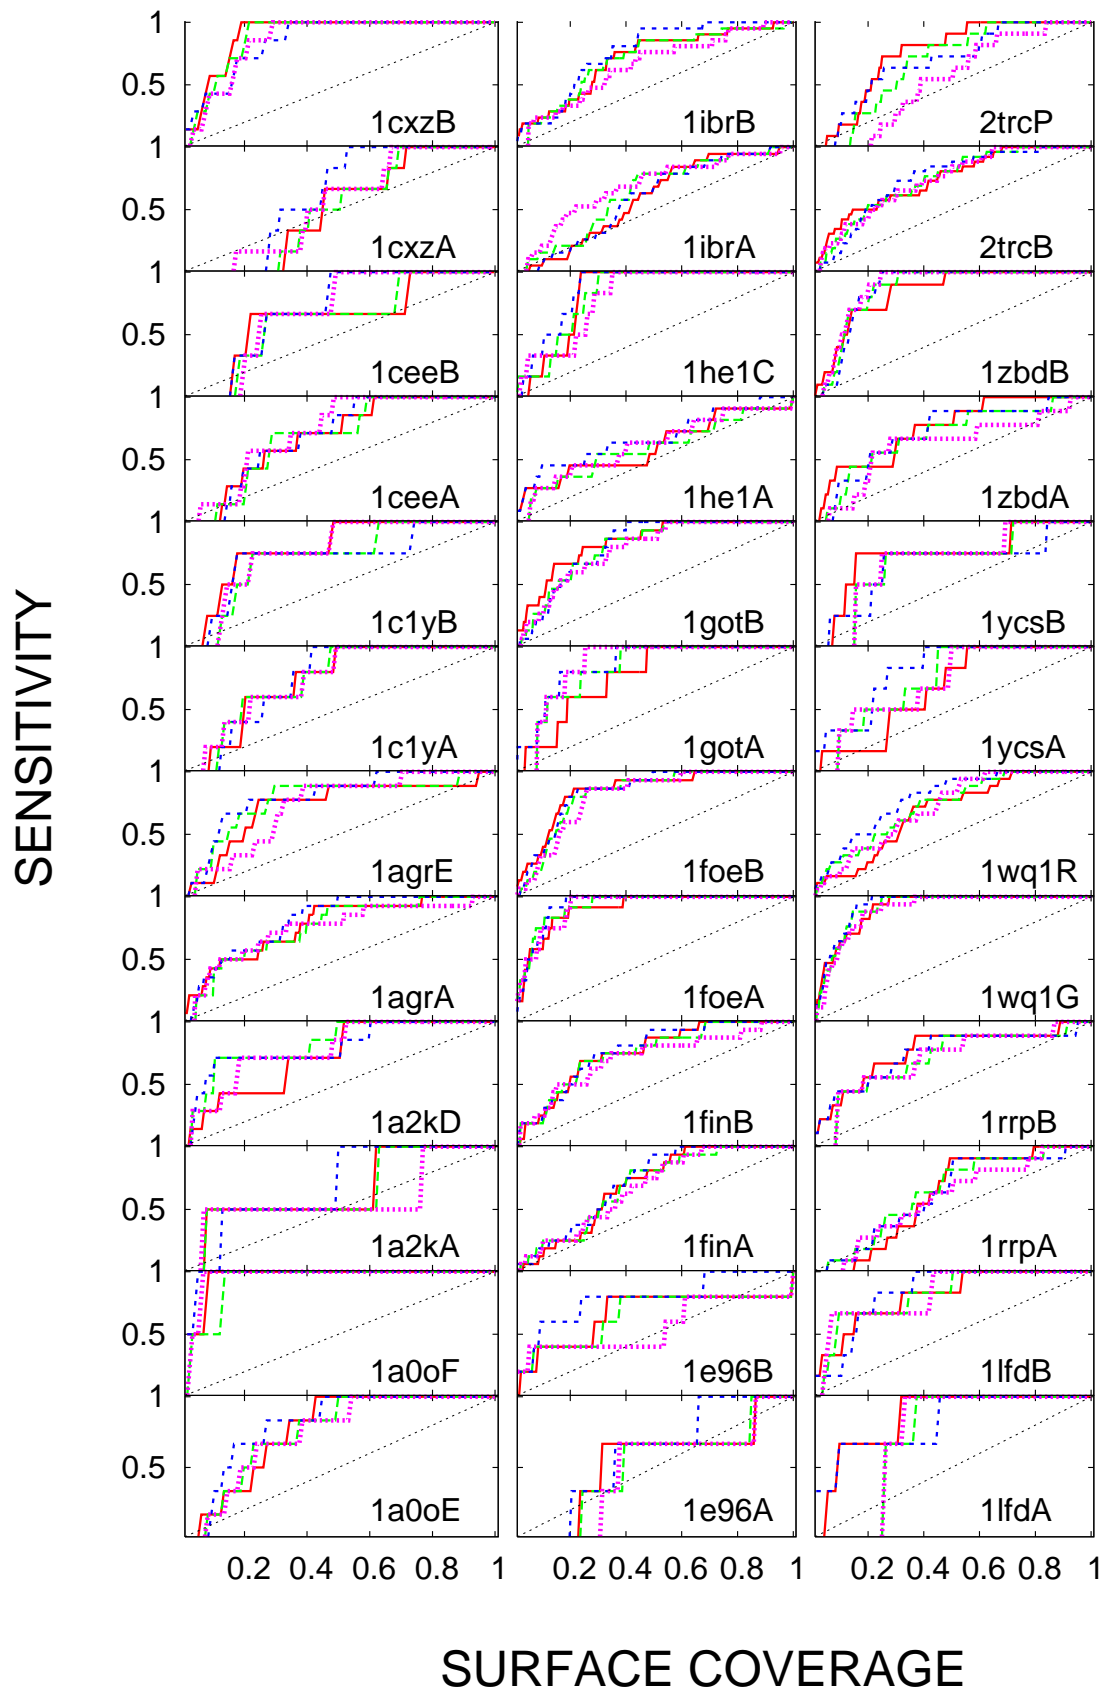

Figure 5: The same as Fig. 4 in this Supplement, using the set of more distant homologues (the same as Fig. 4 in the main test). The differences in performances of different methods are not statistically significant.
